# Supplementary material for: Clusters of neuronal neurofascin prefigure the position of a subset of nodes of Ranvier along individual central nervous system axons in vivo
Source: PubMed Central journal article supplement — Cell Rep. 2022 Feb 15;38(7):110366. doi: 10.1016/j.celrep.2022.110366 (PMC8864464; doi:10.1016/j.celrep.2022.110366), 2022-02-15
Supplement: mmc2.pdf [file mmc2.pdf]

## Clusters of neuronal neurofascin prefigure the position of a subset of nodes of Ranvier along individual central nervous system axons *in vivo*

### Graphical abstract

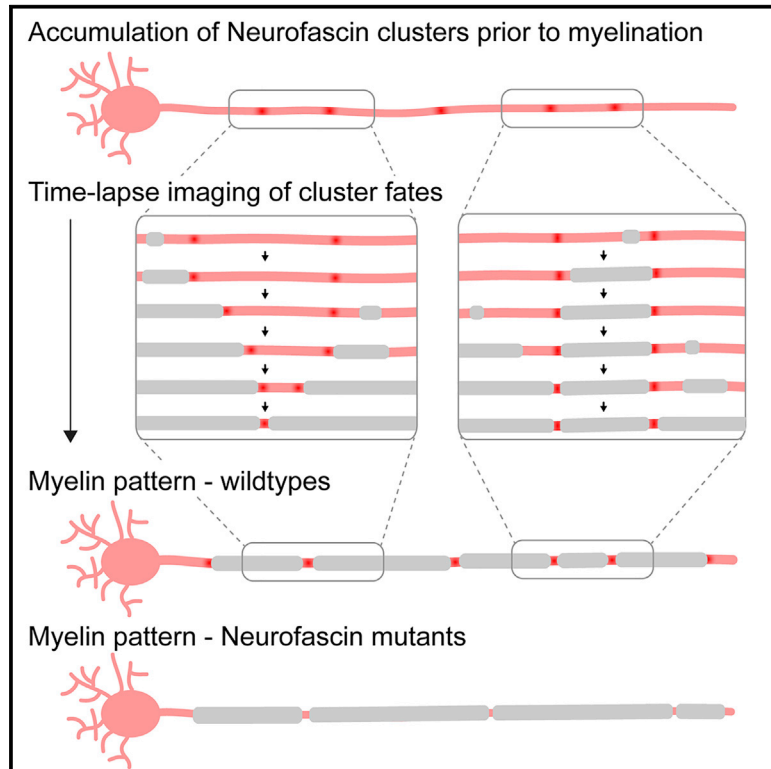

### Authors

Stavros Vagionitis, Franziska Auer, Yan Xiao, Rafael G. Almeida, David A. Lyons, Tim Czopka

### Correspondence

tim.czopka@ed.ac.uk

### In brief

How nodes of Ranvier get positioned to pattern myelinated axons is unclear. Vagionitis et al. reveal that stable clusters of axonal neurofascin can prefigure future node position, thus revealing a neuronal mechanism to determine node position, which acts in addition to their regulation by myelin sheath growth.

### Highlights

- Stable clusters of neuronal neurofascin can form along axons prior to myelination
- Some clusters are pushed in place by developing myelin sheaths
- Other clusters restrict sheath growth and thus prefigure node position
- Animals lacking axonal neurofascin have longer and less regular internodal spacing

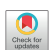

## Report

# Clusters of neuronal neurofascin prefigure the position of a subset of nodes of Ranvier along individual central nervous system axons *in vivo*

Stavros Vagionitis,<sup>1,5</sup> Franziska Auer,<sup>1,5</sup> Yan Xiao,<sup>1</sup> Rafael G. Almeida,<sup>2</sup> David A. Lyons,<sup>2</sup> and Tim Czopka<sup>1,3,4,6,\*</sup><sup>1</sup>Institute of Neuronal Cell Biology, Technical University of Munich, 80802 Munich, Germany<sup>2</sup>Centre for Discovery Brain Sciences, University of Edinburgh, EH16 4SB Edinburgh, UK<sup>3</sup>Munich Cluster of Systems Neurology (SyNergy), 81377 Munich, Germany<sup>4</sup>Centre for Clinical Brain Sciences, University of Edinburgh, Chancellor's Building, 49 Little France Crescent, EH16 4SB Edinburgh, UK<sup>5</sup>These authors contributed equally<sup>6</sup>Lead contact\*Correspondence: [tim.czopka@ed.ac.uk](mailto:tim.czopka@ed.ac.uk)<https://doi.org/10.1016/j.celrep.2022.110366>

## SUMMARY

The spacing of nodes of Ranvier crucially affects conduction properties along myelinated axons. It is assumed that node position is primarily driven by growing myelin sheaths. Here, we reveal an additional mechanism of node positioning that is driven by the axon. Through longitudinal live imaging of node formation dynamics in the zebrafish central nervous system, we show that stable clusters of the cell adhesion molecule neurofascin a can accumulate at specific sites along axons prior to myelination. While some of these clusters are pushed into future node position by extending myelin sheaths, others are not and thus prefigure the position of where a mature node forms. Animals that lack full-length neurofascin a show increased internodal distances and less regular nodal spacing along single axons. Together, our data reveal the existence of an axonal mechanism to position nodes of Ranvier that does not depend on regulation by myelin sheath growth.

## INTRODUCTION

The myelination of axons is crucial for fast propagation of action potentials. Myelin restricts the localization of voltage-gated ion channels to discrete axonal subdomains around the nodes of Ranvier (Rasband and Peles, 2020; Sherman and Brophy, 2005). Not all axons are myelinated equally along their length but can instead show variable and highly organized internodal distances, with implications for conduction speed and circuit function (Brill et al., 1977; Ford et al., 2015; Waxman, 1997; Xin and Chan, 2020). Although we have a detailed understanding of the molecules that organize node of Ranvier architecture in general (Rasband and Peles, 2020), the mechanisms that determine where nodes are positioned along the length of individual myelinated axons are not understood.

It is known that myelin sheath length determines node position and thus the distance between consecutive nodes (the internodal spacing). This is due to the fact that a node is characterized as being localized to the gap between two adjacent myelin sheaths, and because the paranodal junctions act as molecular sieves that restrict the localization of ion channels and adhesion molecules to discrete microdomains around the node (Pedraza et al., 2001). Furthermore, it has been shown that developing myelin sheaths grow to different lengths in response to neural activity (Baraban et al., 2017; Krasnow et al., 2017). Therefore, the prevailing view is that sheaths push all nodes in position

and that nodal spacing is thus determined by regulation of myelin growth. However, during the myelination of a single axon along its length, individual sheaths are added at different points in time and by different oligodendrocytes. It remains unclear how specific myelination patterns, such as even spacing along the axon, or their progressive shortening toward the synapse, can be achieved by only controlling myelin growth.

One simple alternative mechanism besides oligodendrocyte control of node position would be that the axon itself provides cues that restrict myelin sheath growth. One axonal feature that inherently limits sheath growth and determines node position is their branching pattern. However, we have previously shown that extension of developing myelin sheaths often occurs asymmetrically, even in the absence of obvious physical barriers, such as axon branches or adjacent myelin sheaths that could restrict lateral myelin growth (Auer et al., 2018). These observations suggest that other axonal cues might restrict sheath growth beyond certain points and therefore determine the position of where a node will form. It is known that neurons can form pre-nodal clusters along unmyelinated axons *in vitro* and *in vivo* (Freeman et al., 2015; Kaplan et al., 1997). However, if the localization of such pre-myelinating node clusters is a determinant of node of Ranvier position along axons *in vivo* is not known.

Here, we investigated node of Ranvier positioning along single axons using *in vivo* live cell imaging in the zebrafish spinal cord.

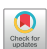

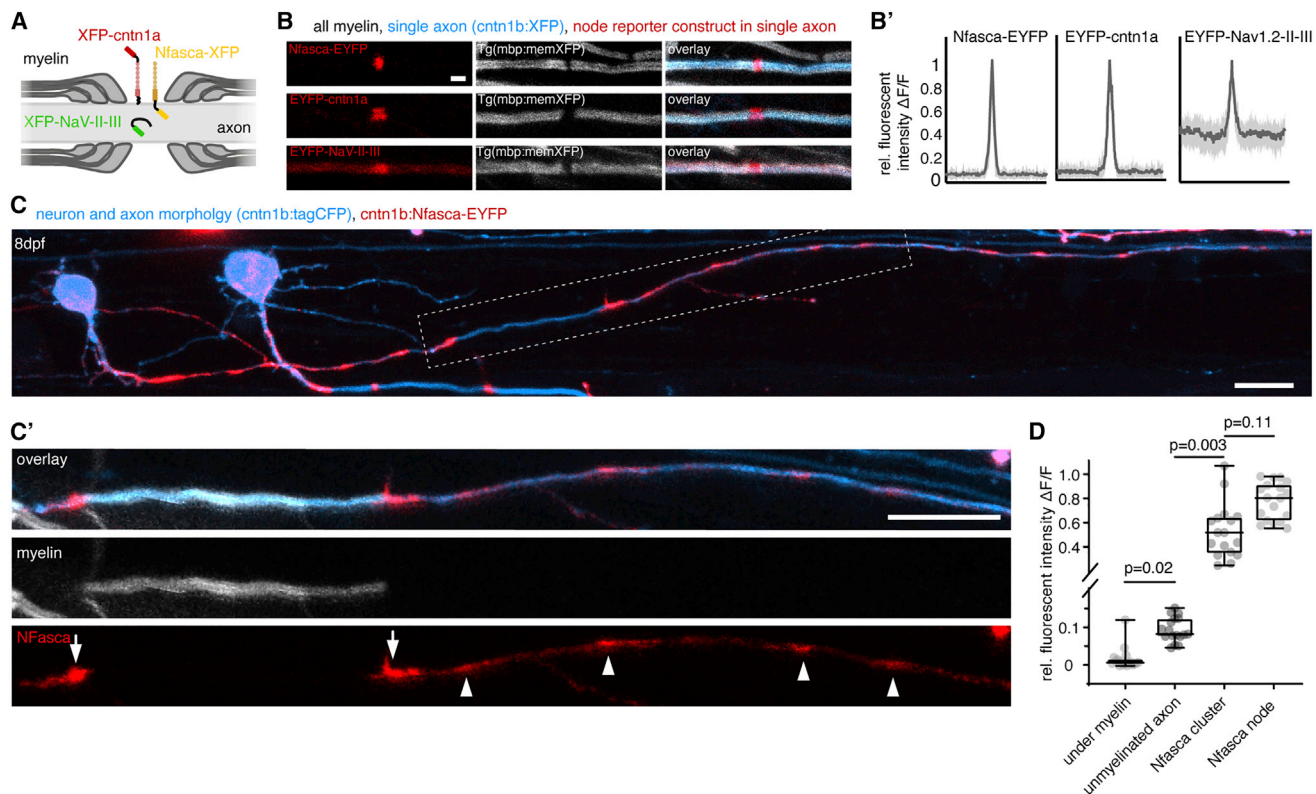

**Figure 1. Localization of transgenic node of Ranvier reporters along unmyelinated and myelinated axon stretches**

(A) Schematic of node of Ranvier reporter constructs used.

(B) Confocal images of nodal reporters along individually labeled myelinated axons in transgenic animals that have all myelin labeled. Scale bar, 2  $\mu$ m. (B') Fluorescence intensity traces of each reporter around the node. Bold lines represent mean, shaded areas SD; n = 3/3 (Nfasca), 4/3 (Cntn1a), and 5/4 (Nav-II-III) animals/technical replicates.

(C) Individually partially myelinated axon at 8 dpf co-expressing cntn1b:Nfasca-EYFP in a full transgenic myelin reporter background. (C') Magnification of the boxed area in (C). Arrowheads indicate Nfasca-EYFP clusters along unmyelinated axon parts. Arrows point to heminodal Nfasca-EYFP. Scale bars, 10  $\mu$ m.

(D) Fluorescence intensity quantifications at different regions. Median  $\pm$  IQR (Kruskal-Wallis test with multiple comparisons); n = 7/7 animals/technical replicates. See also Figure S1 for supporting information.

We show that the neuronal cell adhesion molecule neurofascin a (Nfasca) accumulates along single axons prior to myelination. These clusters were either pushed in place by developing myelin sheaths, or appear to restrict sheath extension and were therefore predictive for future node position. Animals that lack neuronal Nfasca showed increased internodal distances and less regular nodal spacing along single axons. Therefore, we reveal the existence of an axonal mechanism of node positioning, which acts in addition to and independently of regulation of myelin sheath length.

## RESULTS

### Localization dynamics of node of Ranvier reporter constructs during myelination of single axons

We studied node of Ranvier positioning along axons of commissural primary ascending (CoPA) and circumferential descending (CiD) neurons of larval zebrafish, which are both glutamatergic spinal interneurons with frequently myelinated axons (Higashijima et al., 2004; Koudelka et al., 2016). Nodes were labeled using three transgenic live-cell reporters that localize by

different mechanisms: the GPI-anchored adhesion molecule contactin1a with EYFP fused to its N terminus (EYFP-cntn1a); the intracellular ankyrin G targeting motif of zebrafish Nav1.2 (EYFP-NaV-II-III); and neuronal neurofascin (Nfasca) as a transmembrane protein with a C-terminal fusion of EYFP (Nfasca-EYFP) (Figure 1A) (Auer et al., 2018; Garrido et al., 2003; Koudelka et al., 2016). Co-expression of these constructs in single neurons alongside a cytoplasmic fluorescent protein to outline axon morphology (cntn1b:XFP) in animals that have all myelin labeled (Tg(mbp:memXFP)) showed that all three nodal reporter constructs specifically accumulate in the gap between two adjacent myelin sheaths (Figure 1B). EYFP-cntn1a and Nfasca-EYFP fluorescence was completely excluded from myelinated axon parts (in agreement with previous observations) (Auer et al., 2018; Koudelka et al., 2016), whereas EYFP-NaV-II-III retained some fluorescence within/underneath ensheathed axon stretches (Figures 1B and 1B'). In contrast to the highly organized localization of our reporters along myelinated and nodal regions, the distribution of all three live-cell reporters was rather diffuse along unmyelinated stretches of partially myelinated axons (Figures 1C and S1A–S1C). However, we did regularly observe accumulations

of Nfasca-EYFP fluorescence along unmyelinated stretches that resembled the accumulations at nodes and heminodes (Figures 1C' and S1A). No signs of oligodendrocyte ensheathment could be detected in the vicinity of these Nfasca-EYFP accumulations, nor was diffuse Nfasca-EYFP fluorescence excluded from the respective axon stretches, as it would be the case upon myelin ensheathment (Figures 1D and S1D). Nfasca-EYFP clusters were about five times brighter than unmyelinated regions and of comparable, yet slightly lower, fluorescence intensity than nodes (relative Nfasca fluorescence:  $0.1 \pm 0.03$  unmyelinated versus  $0.5 \pm 0.2$  at cluster versus  $0.8 \pm 0.2$  at node,  $n = 7/7$  axons/animals,  $p = 0.003$  unmyelinated versus cluster,  $p = 0.11$  cluster versus node [Kruskal-Wallis test with multiple comparisons]; Figure 1D). We did not detect any cluster accumulations using *cntn1a* and NaV-II-III reporter constructs (Figures S1B and S1C). Pre-nodal clusters have previously been reported in different systems, including cell cultures and in rodents *in vivo* (Freeman et al., 2015; Kaplan et al., 1997). To confirm that also zebrafish axons can endogenously form such pre-nodal clusters, we carried out whole-mount immunohistochemistry for neurofascin and large-caliber axons in a transgenic myelin reporter line. Using this assay, we were able to identify nodes, heminodes, and Nfasca clusters along unmyelinated axon stretches, just as we did using the Nfasca-EYFP reporter (Figure S1E). Thus, we conclude that Nfasca-EYFP accumulations represent pre-nodal clusters as previously reported in other models.

### Neurofascin clusters remain stable along unmyelinated axons and do not associate with processes of oligodendrocyte precursor cells

Having identified pre-nodal clusters in zebrafish, which is an excellent model for *in vivo* imaging over time, we sought to explore the dynamics and fates of these clusters to reveal their role for node of Ranvier positioning during the myelination of individual axons. Consecutive imaging of Nfasca-EYFP labeled single axons revealed that Nfasca clusters along unmyelinated axon stretches were largely stable and comparable to the low motility of nodes between myelin sheaths ( $2.5 \pm 1.9$   $\mu\text{m}$  cluster movement versus  $1.8 \pm 1.1$   $\mu\text{m}$  node movement per day [ $n = 33/5$  clusters/axons and  $31/9$  nodes/axons,  $p = 0.3$ ; Mann-Whitney test]; Figures 2A and 2B). Only 6% (4/62) of all clusters analyzed disappeared over a 2-day period along unmyelinated axon domains (Figure 2C). It has been reported that processes of oligodendrocyte precursor cells (OPCs) can associate with nodes and pre-nodal clusters to varying extents (Biase et al., 2017; Serwanski et al., 2017; Thetiot et al., 2020). To test if OPC processes associate with Nfasca clusters where they could be held in position, we analyzed their co-localization in full transgenic *olig1:mScarlet-CAAX*, which have all OPC processes labeled. The vast majority of clusters analyzed had no associated OPC processes (60/80), 18/80 clusters had an OPC process crossing in the same imaging plane and only 2/80 clusters were associated with a terminal OPC process ( $n = 4$  axons/animals; Figures 2D and 2E). Furthermore, cluster-OPC contacts were only transient and never lasted over the entire period of a 150 min time lapse (Figures 2D' and S2). Therefore, we conclude that Nfasca clusters are stable over time and held in position by a mechanism that is independent of oligodendroglial contact.

### Neurofascin clusters can prefigure node of Ranvier localization

Because Nfasca clusters were stationary and interspersed on axon stretches that were not yet myelinated, we wondered how their positioning correlates with future node position. Indeed, Nfasca clusters appeared regularly spaced, but with overall shorter distancing than was seen for nodes ( $18.2 \pm 8$   $\mu\text{m}$  inter-cluster distance versus  $30.9 \pm 13.2$   $\mu\text{m}$  internodal distance,  $n = 45/6/4$  interclusters/axons/animals and  $25/4/4$  internodes/axons/animals,  $p < 0.001$  [unpaired t test]; Figure 3A). It is known that components of nodes of Ranvier accumulate adjacent to the ends of myelin sheaths to form heminodes prior to forming nodes (Rasband and Peles, 2020). In our system, 79% of isolated myelin sheath ends that have no neighboring myelin showed a heminodal Nfasca accumulation (75/95 heminodes,  $n = 22/21$  axons/animals) (Figure 3B). Interestingly, the remaining 21% of myelin sheaths that did not have a Nfasca-labeled heminode were overall shorter than the ones with heminodal Nfasca, both in live cell imaging using Nfasca-EYFP as well as in immunohistochemistry for endogenous Nfasca (live cell imaging:  $35 \pm 12$   $\mu\text{m}$  versus  $23 \pm 14$   $\mu\text{m}$ ,  $n = 58/16$  sheaths,  $p < 0.001$  [Mann-Whitney test]; immunohistochemistry:  $25 \pm 14$   $\mu\text{m}$  versus  $11 \pm 8$   $\mu\text{m}$ ,  $n = 72/90$  sheaths,  $p < 0.001$  [Mann-Whitney test]; Figures 3B, 3C, and S3A). Despite this overall correlation that longer sheaths have heminodal Nfasca, whereas shorter and presumably younger sheaths do not, we could not identify a strong linear correlation between sheath length and Nfasca intensity in a bulk analysis ( $n = 37/14$  heminodes/axons [animals], Spearman  $r = 0.3546$ , two-tailed  $p$  value =  $0.0313$ ,  $\alpha = 0.05$ ). However, time-lapse imaging of individual axons did reveal a gradual increase of heminodal Nfasca over time (Figure S3B').

Shorter sheaths are an indication that they may have formed more recently and are therefore still growing. It is conceivable that nascent sheaths could initially form in between clusters, form a heminode when meeting a cluster, and continue to grow while pushing the cluster until apposing another sheath. In this scenario, sheath growth would determine cluster fate and future node position. Alternatively, developing myelin sheaths stop growing when they meet a cluster. In this scenario, cluster position would pre-determine node position. To investigate cluster fates, we followed single axons from unmyelinated through myelinated stages (Figure S3C). We saw that nascent sheaths could indeed encounter a Nfasca cluster and then continue to grow while pushing the cluster by forming a heminode, which ultimately fused with an adjacent myelin sheath to form a node (Figure 3D). In other cases, however, sheaths did not push the cluster further but instead stopped growing upon encountering a cluster, leading to the formation of either a stationary heminode, or of a node in this position (Figures 3D–3D'''). To determine how frequently Nfasca clusters prefigure node position, we analyzed timelines of single axons expressing Nfasca-EYFP during their myelination between 3 and 8 dpf. Of all 62 clusters analyzed (5/5 axons/animals), 9/62 (14.5%) remained clusters because the axon did not get myelinated and 4/62 (6.5%) clusters disappeared or merged with other clusters in the absence of any myelination. Among the remaining 49 Nfasca clusters, the position of 40.8% (20/49) was predictive of the location of a node (12/49) or a stationary heminode (8/49)

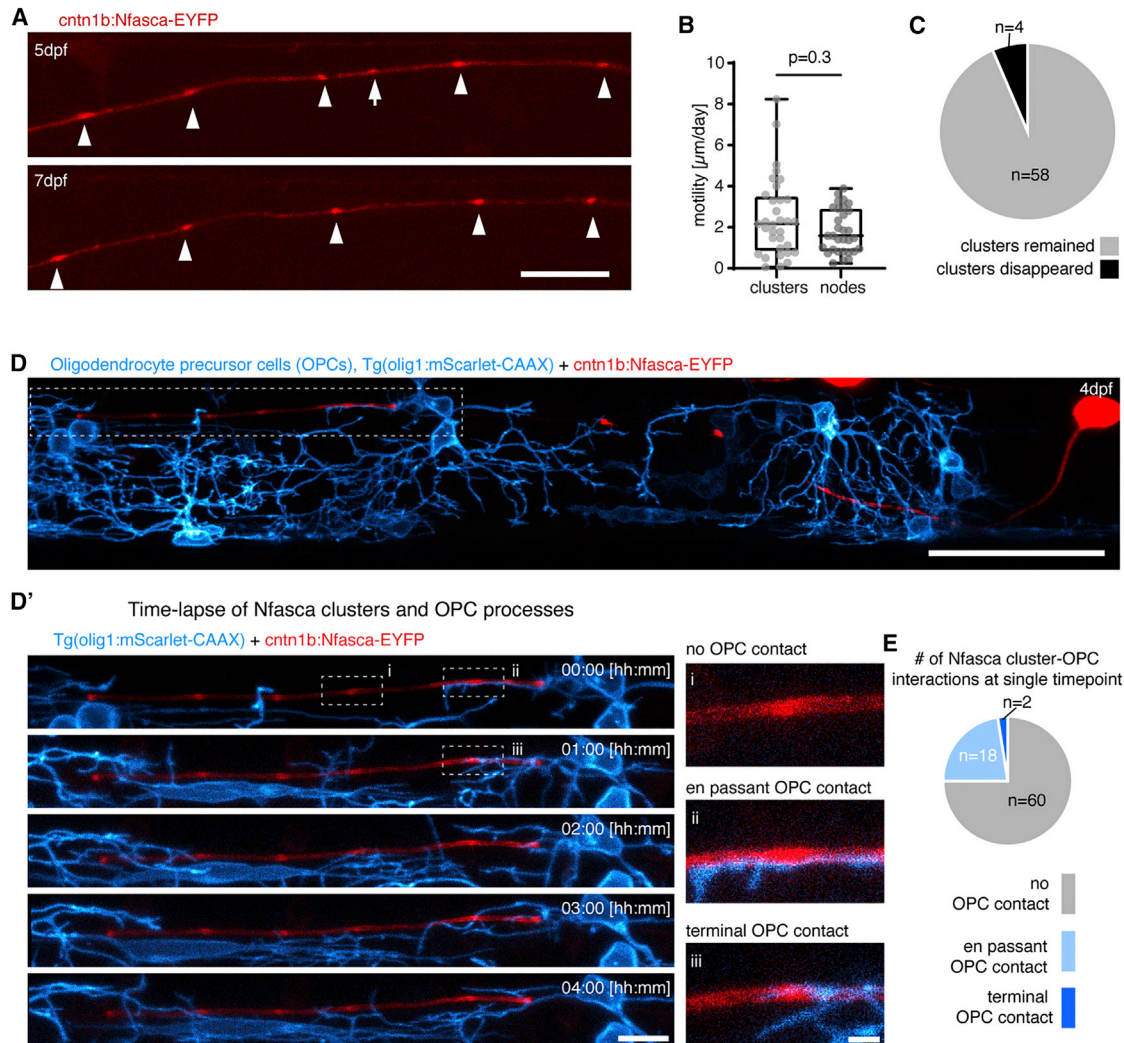

**Figure 2. Clusters of neuronal neurofascin are stable over time and do not co-localize with processes of oligodendrocyte precursor cells**  
 (A) Individual unmyelinated axon expressing Nfasca-EYFP at two different time points. Arrowheads depict stable clusters and the arrow points to a cluster that disappears between time points. Scale bar, 20  $\mu\text{m}$ .  
 (B) Quantification of Nfasca cluster and node motility. Median  $\pm$  IQR (Mann-Whitney test);  $n = 5/5$  (cluster motility) and  $9/6$  (node motility) animals/technical replicates.  
 (C) Frequency of cluster disappearance.  
 (D) Axon expressing Nfasca-EYFP in a transgenic animal that has all OPCs labeled. Scale bar, 50  $\mu\text{m}$ . (D') (Left) Magnification of the boxed area in (D) showing OPC processes in relation to Nfasca-EYFP accumulations over time. Scale bar, 10  $\mu\text{m}$ . (Right, i-iii) Examples of possible cluster-OPC process interactions. Scale bar, 2  $\mu\text{m}$ .  
 (E) Quantification of the frequency of cluster-OPC process interactions;  $n = 4/2$  animals/technical replicates.  
 See also [Figure S2](#) for supporting information.

by the end of analysis, while 59.2% (29/49) of clusters changed in position together with a growing myelin sheath (either by direct observation of heminode formation followed by pushing with growing myelin [12/49] or by a sheath ending up over former cluster position [17/49]) (Figure 3E). Likewise, a retrospective inspection on nodal origin showed that 55% of all nodes analyzed (18/33 nodes in 7 animals) had a Nfasca-EYFP cluster at the same position prior to any sign of myelination (Figure S3D). No indications for the site of future node positioning prior to myelination were detectable using the nodal reporters EYFP-cntn1a and EYFP-Nav-II-III (Figure S3D). To rule out that the

observed co-localizations between cluster and node position occurred by chance, for example, because myelin sheaths just happened to stop extending in this position, we simulated how often clusters and nodes would randomly co-localize using the intercluster and internodal distances observed *in vivo*. Our modeling revealed no more than  $12\% \pm 5\%$  probability that a cluster would prefigure node position by chance in a prospective analysis of cluster fates, and no more than  $20\% \pm 7\%$  probability in a retrospective analysis of node origin (Figures 3F and S3E). In strong contrast, our measured values showed an at least 2-fold higher probability that clusters prefigure node position (24.5%

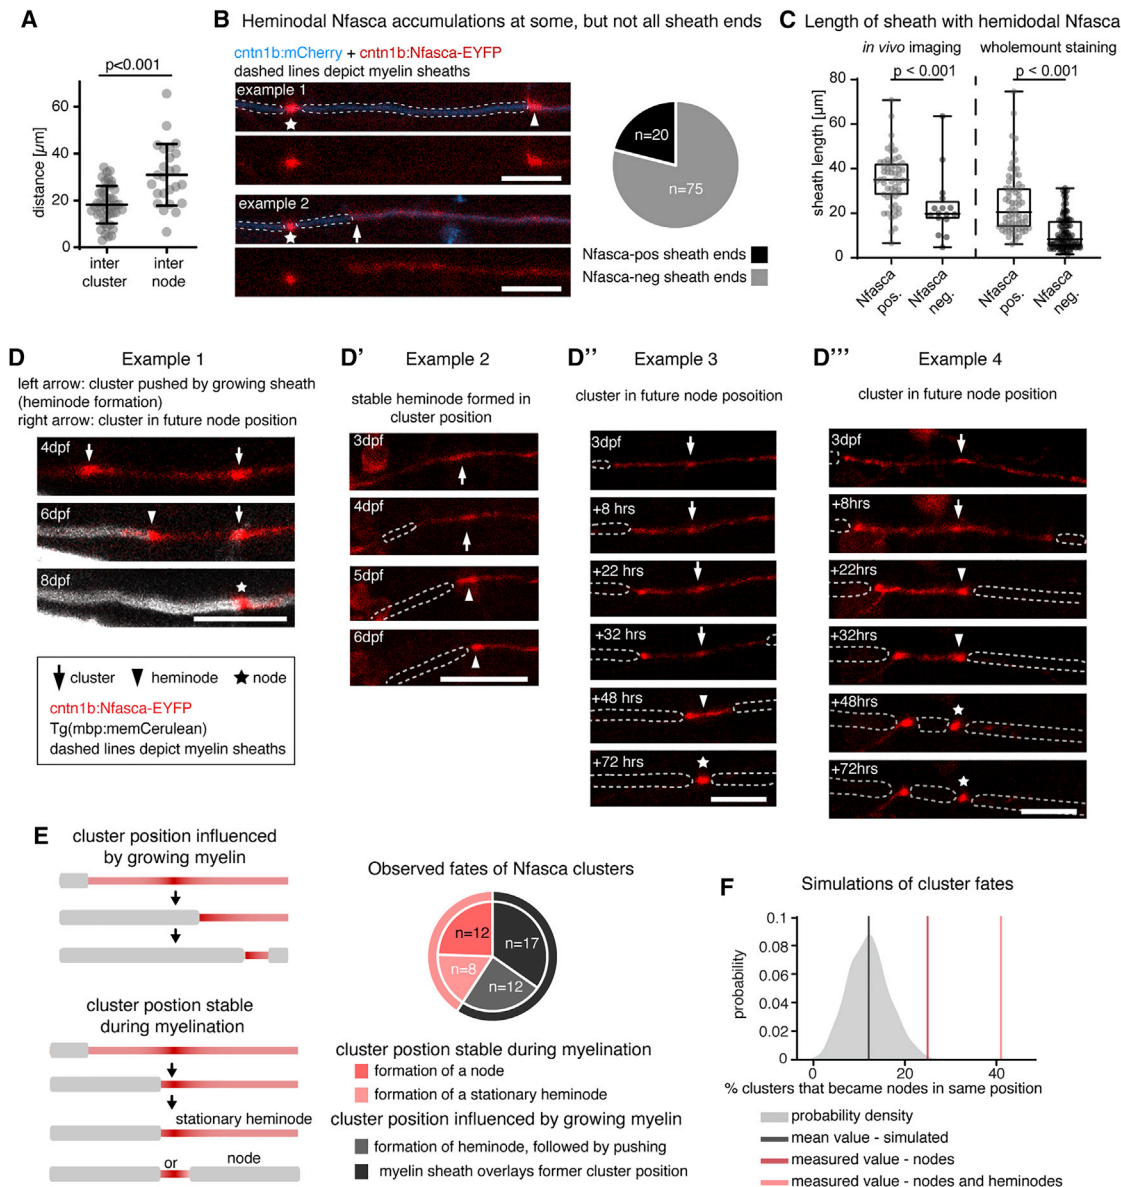

**Figure 3. Clusters of neuronal neurofascin correlate with future node position and restrict myelin sheath extension**

(A) Quantification of intercluster and internodal distances along single axons. Data are expressed as mean  $\pm$  SD (unpaired t test);  $n = 4/3$  animals/technical replicates.

(B) Example images of two individual myelinated areas (dashed lines) forming a node at their left side (asterisk), and the presence (top, arrowhead) and absence (bottom, arrow) of Nfasca-EYFP heminodal accumulation at their right sheath end. Pie chart shows frequency of observations;  $n = 5/3$  animals/technical replicates. Scale bars, 10  $\mu\text{m}$ .

(C) Length of Nfasca-EYFP positive and negative sheath ends. Data derived from both *in vivo* imaging (left) and imaging of whole-mount immunohistochemistry (right). Median  $\pm$  IQR (Mann-Whitney test);  $n = 8/2$  (live imaging) and  $7/1$  (histochemistry) animals/technical replicates.

(D–D''') Individual axon expressing Nfasca-EYFP at different time points. Dashed lines indicate myelin sheaths. Arrows depict Nfasca clusters, arrowheads point to heminodes, and asterisks depict nodes of Ranvier. Scale bars, 10  $\mu\text{m}$ .

(E) Possible cluster fates and quantification of frequencies observed by time lapse imaging;  $n = 5/3$  animals/technical replicates.

(F) Modeling of cluster fates and predicted co-localization with nodes when random positioning is assumed. The shaded curve shows the probability distribution for the simulated values (gray line indicates the mean of simulated data). The light red and dark red lines indicate the quantified cluster fates analysis shown in (E). See also Figure S3 for supporting information.

[prospective] and 55% [retrospective], and even 40.8% [prospective] and 66.7% [retrospective] when also stationary heminodes were included, which ultimately convert into nodes as

well). Together, these data show that the position of Nfasca clusters can correlate with future node of Ranvier position in many cases.



et al., 2005), our zebrafish *nfasca* mutants are viable through adulthood and appear to breed normally (not shown). *Nfasca* mutants showed grossly normal myelination and even had discrete gaps between adjacent myelin sheaths that accumulated EYFP-*cntn1a* and EYFP-Nav-II-III reporters (Figures 4C–4E), consistent with the premise that myelination with an intact paranodal junction is sufficient to cluster nodal components in the absence of axonal *Nfasc186* in rodents (Zonta et al., 2008). However, analysis of node position along single axons at 8–10 dpf using EYFP-*cntn1a* revealed an overall increase of internodal distances by about 18% in *Nfasca* mutants over wild types ( $47.1 \pm 8.4$  in wild types versus  $56.7 \pm 7.7$  in *nfasca*<sup>Δ28/Δ28</sup> in  $n = 10/14$  axons in 9/14 animals,  $p = 0.02$  [Brown-Forsythe ANOVA with multiple comparisons]; Figures 4F and 4G). Importantly, increased internodal distances observed in *Nfasca* mutants could be rescued to wild-type levels by re-expressing *Nfasca*-EYFP in individual axons of *Nfasca* mutants ( $56.7 \pm 7.7$  in *nfasca*<sup>Δ28/Δ28</sup> versus  $48.5 \pm 11.5$  in *nfasca*<sup>Δ28/Δ28</sup> inj. *Nfasca*-EYFP  $n = 14/14$  axons in 14/14 animals,  $p = 0.04$  [Brown-Forsythe ANOVA with multiple comparisons]; Figure 4G). Expression of the nodal reporter *Nfasca*-EYFP and EYFP-*cntn1a* itself had no effect on internodal distances in wild types ( $47.1 \pm 8.4$  for EYFP-*cntn1a* versus  $45.6 \pm 10.9$  for *Nfasca*-EYFP in  $n = 10/10$  axons in 9/10 animals,  $p = 0.7$  [unpaired t test]; Figure S4D). Closer analysis revealed that this increase in internodal distances seen in *Nfasca* mutants was caused by an increase in the maximum internode length per axon ( $83.5 \pm 22.4$  μm in wild type versus  $110.6 \pm 20.4$  μm in *nfasca*<sup>Δ28/Δ28</sup> versus  $77.8 \pm 22.4$  μm in *nfasca*<sup>Δ28/Δ28</sup> rescue;  $p = 0.007$  [wild type versus *nfasca*<sup>Δ28/Δ28</sup>] and  $p < 0.001$  [*nfasca*<sup>Δ28/Δ28</sup> versus *nfasca*<sup>Δ28/Δ28</sup> rescue; Brown-Forsythe ANOVA with multiple comparisons]; Figures 4G' and S4C). Minimum internodal length did not change in either condition ( $21 \pm 9.4$  μm in wild type versus  $20.8 \pm 9.6$  μm in *nfasca*<sup>Δ28/Δ28</sup> versus  $24 \pm 10.1$  μm *nfasca*<sup>Δ28/Δ28</sup> rescue,  $p > 0.3$  between all conditions [Kruskal-Wallis test with multiple comparisons]; Figures 4G'' and S4C). As a result, nodes in *Nfasca* mutants were less regularly spaced and showed an average 44% increase in the range of internodal distances along individual axons, which was again rescued upon re-expression of *Nfasca*-EYFP in *nfasca*<sup>Δ28/Δ28</sup> ( $62.6 \pm 21.5$  μm in wild types versus  $89.8 \pm 25.7$  μm in *nfasca*<sup>Δ28/Δ28</sup> versus  $53.8 \pm 25.4$  μm *nfasca*<sup>Δ28/Δ28</sup> rescue,  $p = 0.01$  [wild type versus *nfasca*<sup>Δ28/Δ28</sup>] and  $p = 0.001$  [*nfasca*<sup>Δ28/Δ28</sup> versus *nfasca*<sup>Δ28/Δ28</sup> rescue; Brown-Forsythe ANOVA with multiple comparisons]; Figure 4G'''). Therefore, we conclude that axonal *Nfasca* plays a functional role in regulating the pattern of nodal spacing along individual axons, likely by restricting myelin sheath extension.

## DISCUSSION

Our data provide evidence that the axon itself can play an instructive role in determining the position of its nodes of Ranvier. It is well established that formation and maintenance of node of Ranvier architecture requires intrinsic (linkage to axonal cytoskeleton) and extrinsic mechanisms (secreted glial ECM and paranodal adhesion) (Rasband and Peles, 2020; Susuki et al., 2013). It is also known that oligodendrocyte-conditioned medium is sufficient to induce sodium channel clustering *in vitro*,

and it has been speculated that such clusters serve as pre-assembled immature nodes (Kaplan et al., 1997). However, the position where nodes form along an axon had remained essentially uninvestigated. Our data extend current knowledge by providing *in vivo* evidence that such pre-myelinating clusters can pre-pattern the axon and determine future node position by restricting sheath growth.

Axon-intrinsic mechanisms may be sufficient to target components of future nodes at specific sites along the length of axons through their linkage to the axon-cytoskeleton, as *Nfasc186* does by directly binding to ankyrin G (Davis et al., 1993), although the traditional view has been that myelination precedes AnkG and *Nfasc186* accumulation in the central nervous system (CNS) (Jenkins and Bennett, 2002; Rasband et al., 1999). Our finding that some clusters were stationary and thus prefigured node position, while other clusters were pushable by growing myelin sheaths, raises the possibility that stationary clusters may be anchored to the axon-cytoskeleton, whereas the moveable clusters are not (yet) and are thus more immature. However, we could not detect clustering of our NavII-III live-cell reporter prior to myelination, which targets to nodes via its AnkG binding motif. Thus, it may be that AnkG does not localize to pre-myelinating *Nfasca* clusters. Alternatively, it is possible that the overall low signal-to-noise properties of our NavII-III reporter do not allow us to detect potential early clustering of AnkG, which remains to be investigated in future studies.

Our mutants that lack neuronal transmembrane *Nfasca* show overall increased internodal distances, suggesting that *Nfasca* is either important to form pre-nodal clusters in the first place, or to serve as a stop signal preventing myelin sheath extension beyond certain points. It is also possible that *Nfasca* affects axon-oligodendrocyte interactions in other ways that result in increased internodal distancing, which remains to be investigated. We can only speculate why our neuronal *Nfasca* mutants show no gross neurological defects, which is in contrast to mice that die at early postnatal stages, even upon re-expression of glial *Nfasc155* (Sherman et al., 2005; Zonta et al., 2008). It may be that our mutants still express a functional extracellular portion of *Nfasca* that is dissociated from the axon membrane, as the stop codon is only just prior to the transmembrane domain. Furthermore, in zebrafish glial and neuronal neurofascin are encoded by two separate genes (*nfasca* and *nfascb*) (Klingseisen et al., 2019), which may together with the specifics of our CRISPR-*Nfasca*<sup>Δ28</sup> deletion alleviate the severe phenotypes seen in rodent *nfasca* mutants. Whether CRISPR-*Nfasca*<sup>Δ28</sup> affects axons in additional ways than presented here remains to be addressed in future studies.

The presence of axonal landmarks to determine the site of future node position by restricting myelin sheath growth provides a simple mechanism to pattern an axon along its length. It also provides a plausible explanation why myelin sheaths along partially myelinated axons are not longer than along fully myelinated axons (Auer et al., 2018; Hill et al., 2018; Hughes et al., 2018), and why developing myelin sheaths mostly grow asymmetrically, despite the absence of obvious physical barriers, such as adjacent myelin and axon collateral branches (Auer et al., 2018). It is likely that axonal clustering at future nodal sites is only one of several mechanisms to establish internodal



distances along the axon. Observations by us and others argue that either multiple mechanisms are in place at the same time, and/or that not all axons are patterned by the same mechanisms. For example, it has been reported that only distinct subtypes of axons form clusters (Freeman et al., 2015). Similarly, it has been shown that neuronal activity only promotes myelination of specific axon types (Koudelka et al., 2016; Yang et al., 2020). Moreover, our work reveals that not all clusters convert into nodes, but that developing sheaths relocate cluster position and merge several clusters to single nodes, which is in line with another recent study showing that the number of pre-nodal clusters exceeds the number of nodes by about 2-fold (Thetiot et al., 2020). Together, these observations argue for the existence of two regulatory mechanisms to control node position; one that is axonal and independent of myelin, and another that involves regulation of myelin sheath length, which can intrinsically grow to variable lengths (Bechler et al., 2015), and in response to axonal signals (Baraban et al., 2017; Krasnow et al., 2017). Future studies will be required to elucidate to which degree these two mechanisms pattern different axon types, and whether one of both of these mechanisms can induce remodeling of internodal distances to adapt axon function.

### Limitations of the study

This work provides insights into the fates of pre-nodal clusters and the mechanisms that determine node of Ranvier position along single axons. However, a few caveats remain. Most notably, it remains unclear how prevalent pre-nodal clusters are to prefigure node position in different types of CNS axons. Most live cell imaging data have been obtained from transgenic expression of an NFasca-EYFP fusion protein. Although we provide evidence for endogenous NFasca cluster formation, and for the fact that overexpression of the NFasca-EYFP transgene itself does not affect internodal distances in wild types, we could not determine if this a general mechanism or rather one that is specific to some axons only. In addition, we provide no mechanistic insight into how NFasca clusters might restrict myelin sheath growth, which remains to be addressed in the future.

### STAR★METHODS

Detailed methods are provided in the online version of this paper and include the following:

- **KEY RESOURCES TABLE**
- **RESOURCE AVAILABILITY**
  - Lead contact
  - Materials availability
  - Data and code availability
- **EXPERIMENTAL MODEL AND SUBJECT DETAILS**
  - Zebrafish lines and husbandry
- **METHOD DETAILS**
  - Transgenesis constructs
  - DNA microinjection and generation of transgenic lines
  - Generation of nfasca mutants using CRISPR/Cas9
  - Mounting of zebrafish for live cell microscopy
  - Immunohistochemistry
  - Whole-mount immunohistochemistry

- Microscopy and image acquisition
- **QUANTIFICATION AND STATISTICAL ANALYSIS**
  - Reconstructions of confocal images
  - Fluorescence intensity measurements
  - Node cluster correlation
  - Simulation of node cluster correlation
  - Sheath length measurements
  - Internodal and intercluster distance measurements
  - Node and cluster dynamics
  - NFasca cluster and OPC process interactions
  - Statistics

### SUPPLEMENTAL INFORMATION

Supplemental information can be found online at <https://doi.org/10.1016/j.celrep.2022.110366>.

### ACKNOWLEDGMENTS

We are grateful to Wenke Barkey for excellent technical assistance throughout this study. We thank Laura Fontenas from the Kucenas group (University of Virginia) for helpful advice with whole-mount immunohistochemistry and all members of the Czopka lab for critical input and discussion of the manuscript. This work was funded by the German Research Foundation DFG (ENP C2226/1-1 and C2226/1-2, SFB870 A14 #118803580, and EXC 2145 SyNergy #390857198 to T.C.), a Gertrud Reemtsma PhD student fellowship of the Max-Planck-Society to F.A., support from the TUM PhD program “Medical Life Science and Technology” to S.V., and a Medical Research Council project grant (MR/P006272/1) to R.G.A. and D.A.L.

### AUTHOR CONTRIBUTIONS

Conceptualization, F.A., S.V., and T.C.; methodology, S.V., F.A., and R.G.A.; investigation, S.V., F.A., X.Y., and R.G.A.; formal analysis, S.V. and F.A.; visualization, S.V., F.A., and T.C.; supervision, D.A.L. and T.C.; writing – original draft, T.C.; funding acquisition, all authors.

### DECLARATION OF INTERESTS

The authors declare no competing interests.

Received: December 22, 2020

Revised: July 8, 2021

Accepted: January 20, 2022

Published: February 15, 2022

### REFERENCES

- Almeida, R.G., and Lyons, D.A. (2015). Intersectional gene expression in zebrafish using the split KalTA4 system. *Zebrafish* 12, 377–386.
- Almeida, R.G., Czopka, T., French-Constant, C., and Lyons, D.A. (2011). Individual axons regulate the myelinating potential of single oligodendrocytes in vivo. *Development* 138, 4443–4450.
- Auer, F., Vagionitis, S., and Czopka, T. (2018). Evidence for myelin sheath remodeling in the CNS revealed by in vivo imaging. *Curr. Biol.* 28, 549–559.e3.
- Baraban, M., Koudelka, S., and Lyons, D.A. (2017). Ca<sup>2+</sup> activity signatures of myelin sheath formation and growth in vivo. *Nat. Neurosci.* 19, 1–23.
- Bechler, M.E., Byrne, L., and French-Constant, C. (2015). CNS myelin sheath lengths are an intrinsic property of oligodendrocytes. *Curr. Biol.* 25, 2411–2416.
- Biase, L.M.D., Pucak, M.L., Kang, S.H., Rodriguez, S.N., and Bergles, D.E. (2017). Sparse interaction between oligodendrocyte precursor cells (NG2+ cells) and nodes of Ranvier in the central nervous system. <https://doi.org/10.1101/185801>.

- Brill, M.H., Waxman, S.G., Moore, J.W., and Joyner, R.W. (1977). Conduction velocity and spike configuration in myelinated fibres: computed dependence on internode distance. *J. Neurol. Neurosurg. Psychiatry* *40*, 769–774.
- Czopka, T., French-Constant, C., and Lyons, D.A. (2013). Individual oligodendrocytes have only a few hours in which to generate new myelin sheaths in vivo. *Dev. Cell* *25*, 599–609.
- Davis, J.Q., McLaughlin, T., and Bennett, V. (1993). Ankyrin-binding proteins related to nervous system cell adhesion molecules: candidates to provide transmembrane and intercellular connections in adult brain. *JCB* *121*, 121–133.
- Ford, M.C., Alexandrova, O., Cossell, L., Stange-Marten, A., Sinclair, J., Kopp-Scheinpflug, C., Pecka, M., Attwell, D., and Grothe, B. (2015). Tuning of Ranvier node and internode properties in myelinated axons to adjust action potential timing. *Nat. Commun.* *6*, 8073.
- Freeman, S.A., Desmazieres, A., Simonnet, J., Gatta, M., Pfeiffer, F., Aigrot, M.-S., Rappeneau, Q., Guerreiro, S., Michel, P.P., Yanagawa, Y., et al. (2015). Acceleration of conduction velocity linked to clustering of nodal components precedes myelination. *Proc. Natl. Acad. Sci. U S A* *112*, E321–E328.
- Garrido, J.J., Giraud, P., Carlier, E., Fernandes, F., Moussif, A., Fache, M.-P., Debanne, D., and Dargent, B. (2003). A targeting motif involved in sodium channel clustering at the axonal initial segment. *Science* *300*, 2091–2094.
- Higashijima, S.-I., Schaefer, M., and Fetcho, J.R. (2004). Neurotransmitter properties of spinal interneurons in embryonic and larval zebrafish. *J. Comp. Neurol.* *480*, 19–37.
- Hill, R.A., Li, A.M., and Grutzendler, J. (2018). Lifelong cortical myelin plasticity and age-related degeneration in the live mammalian brain. *Nat. Neurosci.* *21*, 683–695.
- Hruscha, A., Krawitz, P., Rechenberg, A., Heinrich, V., Hecht, J., Haass, C., and Schmid, B. (2013). Efficient CRISPR/Cas9 genome editing with low off-target effects in zebrafish. *Development* *140*, 4982–4987.
- Hughes, E.G., Orthmann-Murphy, J.L., Langseth, A.J., and Bergles, D.E. (2018). Myelin remodeling through experience-dependent oligodendrogenesis in the adult somatosensory cortex. *Nat. Neurosci.* *21*, 696–706.
- Jenkins, S.M., and Bennett, V. (2002). Developing nodes of Ranvier are defined by ankyrin-G clustering and are independent of paranodal axoglial adhesion. *Proc. Natl. Acad. Sci. U S A* *99*, 2303–2308.
- Kaplan, M.R., Meyer-Franke, A., Lambert, S., Bennett, V., Duncan, I.D., Levinson, S.R., and Barres, B.A. (1997). Induction of sodium channel clustering by oligodendrocytes. *Nature* *386*, 724–728.
- Klingseisen, A., Ristoiu, A.-M., Kegel, L., Sherman, D.L., Rubio-Brotons, M., Almeida, R.G., Koudelka, S., Benito-Kwiecinski, S.K., Poole, R.J., Brophy, P.J., et al. (2019). Oligodendrocyte Neurofascin independently regulates both myelin targeting and sheath growth in the CNS. *Dev. Cell* *51*, 730–744.e6.
- Koudelka, S., Voas, M.G., Almeida, R.G., Baraban, M., Soetaert, J., Meyer, M.P., Talbot, W.S., and Lyons, D.A. (2016). Individual neuronal subtypes exhibit diversity in CNS myelination mediated by synaptic vesicle release. *Curr. Biol.* *26*, 1447–1455.
- Krasnow, A.M., Ford, M.C., Valdivia, L.E., Wilson, S.W., and Attwell, D. (2017). Regulation of developing myelin sheath elongation by oligodendrocyte calcium transients in vivo. *Nat. Neurosci.* *93*, 1–28.
- Kwan, K.M., Fujimoto, E., Grabher, C., Mangum, B.D., Hardy, M.E., Campbell, D.S., Parant, J.M., Yost, H.J., Kanki, J.P., and Chien, C.-B. (2007). The Tol2kit: a multisite gateway-based construction kit for Tol2 transposon transgenesis constructs. *Dev. Dyn.* *236*, 3088–3099.
- Labun, K., Montague, T.G., Gagnon, J.A., Thyme, S.B., and Valen, E. (2016). CHOPCHOP v2: a web tool for the next generation of CRISPR genome engineering. *Nucleic Acids Res.* *44*, W272–W276.
- Marisca, R., Hoche, T., Agirre, E., Hoodless, L.J., Barkey, W., Auer, F., Castelo-Branco, G., and Czopka, T. (2020). Functionally distinct subgroups of oligodendrocyte precursor cells integrate neural activity and execute myelin formation. *Nat. Neurosci.* *23*, 363–374.
- Pedraza, L., Huang, J.K., and Colman, D.R. (2001). Organizing principles of the axoglial apparatus. *Neuron* *30*, 335–344.
- Rasband, M.N., and Peles, E. (2020). Mechanisms of node of Ranvier assembly. *Nat. Rev. Neurosci.* *22*, 7–20.
- Rasband, M.N., Peles, E., Trimmer, J.S., Levinson, S.R., Lux, S.E., and Shrager, P. (1999). Dependence of nodal sodium channel clustering on paranodal axoglial contact in the developing CNS. *J. Neurosci.* *19*, 7516–7528.
- Serwanski, D.R., Jukkola, P., and Nishiyama, A. (2017). Heterogeneity of astrocyte and NG2 cell insertion at the node of ranvier. *J. Comp. Neurol.* *525*, 535–552.
- Sherman, D.L., and Brophy, P.J. (2005). Mechanisms of axon ensheathment and myelin growth. *Nat. Rev. Neurosci.* *6*, 683–690.
- Sherman, D.L., Tait, S., Melrose, S., Johnson, R., Zonta, B., Court, F.A., Macklin, W.B., Meek, S., Smith, A.J., Cottrell, D.F., et al. (2005). Neurofascins are required to establish axonal domains for saltatory conduction. *Neuron* *48*, 737–742.
- Susuki, K., Chang, K.-J., Zollinger, D.R., Liu, Y., Ogawa, Y., Eshed-Eisenbach, Y., Dours-Zimmermann, M.T., Oses-Prieto, J.A., Burlingame, A.L., Seidenbecher, C.I., et al. (2013). Three mechanisms assemble central nervous system nodes of Ranvier. *Neuron* *78*, 469–482.
- Thetiot, M., Freeman, S.A., Roux, T., Dubessy, A.L., Aigrot, M.-S., Rappeneau, Q., Lejeune, F.-X., Tailleux, J., Sol-Foulon, N., Lubetzki, C., et al. (2020). An alternative mechanism of early nodal clustering and myelination onset in GABAergic neurons of the central nervous system. *Glia* *68*, 1891–1909.
- Vagionitis, S., and Czopka, T. (2018). Visualization and time-lapse microscopy of myelinating glia in vivo in zebrafish. *Methods Mol. Biol.* *1791*, 25–35.
- Waxman, S.G. (1997). Axon-glia interactions: building a smart nerve fiber. *Curr. Biol.* *7*, R406–R410.
- Xin, W., and Chan, J.R. (2020). Myelin plasticity: sculpting circuits in learning and memory. *Nat. Rev. Neurosci.* *21*, 682–694.
- Yang, S.M., Michel, K., Jokhi, V., Nedivi, E., and Arlotta, P. (2020). Neuron class-specific responses govern adaptive myelin remodeling in the neocortex. *Science* *370*, eabd2109.
- Zonta, B., Tait, S., Melrose, S., Anderson, H., Harroch, S., Higginson, J., Sherman, D.L., and Brophy, P.J. (2008). Glial and neuronal isoforms of Neurofascin have distinct roles in the assembly of nodes of Ranvier in the central nervous system. *J. Cell Biol.* *181*, 1169–1177.

## STAR★METHODS

### KEY RESOURCES TABLE

| REAGENT or RESOURCE                                         | SOURCE                                        | IDENTIFIER                                                                                                |
|-------------------------------------------------------------|-----------------------------------------------|-----------------------------------------------------------------------------------------------------------|
| <b>Antibodies</b>                                           |                                               |                                                                                                           |
| chicken anti-GFP                                            | Abcam plc.                                    | RRID: AB_300798                                                                                           |
| mouse IgG1 anti-3A10                                        | DSHB                                          | RRID: AB_531874                                                                                           |
| rabbit anti-Neurofascin                                     | Abcam plc.                                    | RRID: AB_2905463                                                                                          |
| goat anti-mouse IgG, Alexa Fluor 633                        | Thermo Fisher                                 | RRID: AB_2535719                                                                                          |
| goat anti-rabbit IgG, Alexa Fluor 555                       | Thermo Fisher                                 | RRID: AB_141784                                                                                           |
| goat anti-chicken IgY, Alexa Fluor 488                      | Thermo Fisher                                 | RRID: AB_142924                                                                                           |
| <b>Experimental models: Organisms/strains</b>               |                                               |                                                                                                           |
| Tg(mbp:memCerulean) <sup>tum101Tg</sup>                     | <a href="#">Auer et al. (2018)</a>            | ZFIN: ZDB-ALT-180712-3                                                                                    |
| Tg(mbp:KillerRed) <sup>tum103Tg</sup>                       | <a href="#">Auer et al. (2018)</a>            | ZFIN: ZDB-ALT-180712-5                                                                                    |
| Tg(mbp:tagRFPt-CAAX) <sup>tum102Tg</sup>                    | <a href="#">Auer et al. (2018)</a>            | ZFIN: ZDB-ALT-180712-4                                                                                    |
| Tg(cntn1b(3kb):KalTA4)                                      | This paper                                    | N/A                                                                                                       |
| Tg(olig1:mScarlet-CAAX)                                     | This paper                                    | N/A                                                                                                       |
| CRISPR-Nfasca <sup>Δ28</sup>                                | This paper                                    | N/A                                                                                                       |
| <b>Oligonucleotides</b>                                     |                                               |                                                                                                           |
| For all oligonucleotides used, see <a href="#">Table S1</a> | this paper                                    | N/A                                                                                                       |
| <b>Recombinant DNA</b>                                      |                                               |                                                                                                           |
| p5E_cntn1b(3kb)                                             | this paper                                    | N/A                                                                                                       |
| pME_EYFPnostop_NaV-II-III                                   | this paper                                    | N/A                                                                                                       |
| pME_sigpepEYFP_cntn1a                                       | this paper                                    | N/A                                                                                                       |
| p5E_cntn1b(5kb)                                             | <a href="#">Czopka et al. (2013)</a>          | N/A                                                                                                       |
| pME_KalTA4GI                                                | <a href="#">Almeida and Lyons (2015)</a>      | N/A                                                                                                       |
| p5E_UAS(10x)                                                | <a href="#">Kwan et al. (2007)</a>            | N/A                                                                                                       |
| p3E_pA                                                      | <a href="#">Kwan et al. (2007)</a>            | N/A                                                                                                       |
| pDestTol2_pA                                                | <a href="#">Kwan et al. (2007)</a>            | N/A                                                                                                       |
| pME_tagCFP                                                  | <a href="#">Auer et al. (2018)</a>            | N/A                                                                                                       |
| pTol2_cntn1b(5kb):Nfasca-EYFP                               | <a href="#">Auer et al. (2018)</a>            | N/A                                                                                                       |
| pTol2_cntn1b(5kb):EYFP-cntn1a                               | this paper                                    | N/A                                                                                                       |
| pTol2_cntn1b(5kb):EYFP-NaV-II-III                           | this paper                                    | N/A                                                                                                       |
| pTol2_UAS(10x):EYFP-cntn1a                                  | this paper                                    | N/A                                                                                                       |
| pTol2_cntn1b(5kb):tagCFP                                    | this paper                                    | N/A                                                                                                       |
| pTol2_cntn1b(5kb):mCherry                                   | <a href="#">Czopka et al. (2013)</a>          | N/A                                                                                                       |
| <b>Software and algorithms</b>                              |                                               |                                                                                                           |
| Fiji                                                        | <a href="http://fiji.sc/">http://fiji.sc/</a> | RRID: SCR_002285                                                                                          |
| Imaris                                                      | Bitplane                                      | RRID: SCR_007370                                                                                          |
| Imaris FilamentTracer                                       | Bitplane                                      | RRID: SCR_007366                                                                                          |
| Huygens Essential                                           | Scientific Volume Imaging                     | RRID: SCR_014237                                                                                          |
| Graphpad Prism 8                                            | Graphpad Software                             | RRID: SCR_015807                                                                                          |
| Code for simulation of cluster-node correlation             | This paper                                    | ZENODO DOI: <a href="https://doi.org/10.5281/zenodo.5846391">https://doi.org/10.5281/zenodo.5846391</a> . |

### RESOURCE AVAILABILITY

#### Lead contact

Further information and requests for resources and reagents should be directed to the lead contact Tim Czopka ([tim.czopka@ed.ac.uk](mailto:tim.czopka@ed.ac.uk)), and will be fulfilled upon reasonable request.

### Materials availability

All unique/stable reagents generated in this study are available from the lead contact without restriction.

### Data and code availability

- Data reported in this paper will be shared by the lead contact upon reasonable request.
- The code used for the simulation of node cluster correlation is available under <https://doi.org/10.5281/zenodo.5846391>.
- Any additional information required to reanalyze the data reported in this paper is available from the lead contact upon request.

## EXPERIMENTAL MODEL AND SUBJECT DETAILS

### Zebrafish lines and husbandry

The following existing zebrafish lines and strains were used in this study: Tg(mbp:memCerulean)<sup>tum101Tg</sup> (Auer et al., 2018), Tg(mbp:tagRFPT-CAAX)<sup>tum102Tg</sup> (Auer et al., 2018), Tg(mbp:KillerRed)<sup>tum103Tg</sup> (Auer et al., 2018). The following lines have been newly generated for this study: Tg(cntn1b(3kb):KaTA4), Tg(olig1:mScarlet-CAAX), Tg(mbp:mScarlet-CAAX), CRISPR-*nfasca*<sup>Δ28</sup>. All animals were kept at 28.5 degrees with a 14/10 hour light/dark cycle according to the local animal welfare regulations. Animals were used at embryonic and larval stages between 3dpf and 11dpf for live cell imaging, and as adults for histology and breeding. All experiments carried out with zebrafish at protected stages have been approved by the government of Upper Bavaria (animal protocols AZ55.2-1-54-2532-199-2015, ROB-55.2-2532.Vet\_02-15-200, and ROB-55.2-2532.Vet\_02-18-153 to T.C.).

## METHOD DETAILS

### Transgenesis constructs

The following existing expression constructs were used in this study: pTol2\_cntn1b:Nfasca-EYFP (Auer et al., 2018), pTol2\_cntn1b:mCherry (Czopka et al., 2013). The following expression constructs and entry clones were newly generated for this study, with the sequences of all primers used listed in Table S1: p5E\_cntn1b(3kb), for which we cloned a 3kb fragment upstream of the start codon and until the second exon of the *cntn1b* gene (Ensembl(GRCz11): ENSDARG0000045685) from genomic DNA of AB zebrafish. The PCR product was recombined with pDONRP4-P1R using BP clonase (Invitrogen). pME\_EYFP-Nav-II-III, for which a 1.3 kb fragment corresponding to the II-III region of Nav1.2 (Garrido et al., 2003) of the zebrafish *scn1lab* gene (between exons 16 and 18 of Ensembl(GRCz11): ENSDART00000151247.3) was commercially synthesized (BioCat). We then PCR amplified Nav-II-III from this donor plasmid using XhoI-Nav-II-III\_F and XbaI-Nav-II-III\_R primers and used these sites to clone it into pCS2+ containing EYFP with the stop codon removed between BamHI and EcoRI sites. The resulting plasmid pCS2+\_EYFP-Nav-II-III was then used as template for a PCR reaction using attB1\_YFP\_F and attB2R-NavNav-II-III\_R primers, and recombination cloned into pDONR221 using BP clonase, creating pME\_EYFP-Nav-II-III. To generate pME\_EYFP-cntn1a, we first amplified 2.6 kb of the zebrafish *contactin1a* gene (Ensembl(GRCz11): ENSDART00000170348.2) lacking base pairs 1-135 (amino acids 1-45 coding for signal peptide for secretory pathway) from zebrafish cDNA using the primers EcoRI\_cntn1a\_F and XbaI\_cntn1a\_R and cloned into pCS2+ containing EYFP fused to the secretory pathway signal peptide of zebrafish *cd59* (Ensembl(GRCz11): ENSDART00000126737.4) between BamHI and EcoRI sites to create pCS2+\_sigpepEYFP-cntn1a. This plasmid was used as PCR template using the primers attB1\_sigpepEYFP\_F and attB2R\_cntn1a\_R and the PCR product was recombination cloned in pDONR221 using BP clonase to generate pME\_EYFP-cntn1a. To generate pME\_mScarlet-CAAX we used the commercially synthesized construct pUC57\_attB1\_mScarlet\_attB2R (BioCat). This plasmid was then used as template for a PCR reaction using attB1\_F and CAAX-mScarlet\_R. The product of this PCR was used as a template for a subsequent PCR reaction with the primers attB1\_F and AttB2R-CAAX-R and the product of this reaction was cloned into pDONR221 using BP clonase, creating pME\_mScarlet-CAAX.

The expression constructs pTol2\_cntn1b(3kb):KaTA4, pTol2\_cntn1b(5kb):EYFP-cntn1a, pTol2\_cntn1b(5kb):EYFP-Nav-II-III, pTol2\_UAS(10x):EYFP-cntn1a, pTol2\_cntn1b(5kb):tagCFP, pTol2\_olig1:mScarlet-CAAX, and pTol2\_mbp:mScarlet-CAAX were created via multisite LR recombination reactions using the newly generated entry clones described above, in addition to p5E\_cntn1b(5kb) (Czopka et al., 2013), p5E\_olig1 (Marisca et al., 2020), p5E\_mbp (Almeida et al., 2011), pME:KaTA4 (Almeida and Lyons, 2015), pME:tagCFP (Auer et al., 2018) and p5E\_UAS, p3E-pA, and pDestTol2\_pA of the Tol2Kit (Kwan et al., 2007).

### DNA microinjection and generation of transgenic lines

Zebrafish eggs were injected at the one cell stage using a pressure microinjector with 1nl of injection solution (20-30 ng/μl plasmid DNA, 25-60 ng/μl transposase mRNA and 1% phenol-red (Sigma Aldrich)). Injected animals were screened under a stereo-dissecting fluorescence microscope at 3-4 dpf for transgene expression and used for subsequent *in vivo* microscopy or were raised to adulthood. Injected adults were outcrossed to wild type animals and their progenies were screened for germline transmission to raise stable transgenic lines.

### Generation of *nfasca* mutants using CRISPR/Cas9

Zebrafish CRISPR-*Nfasca*<sup>Δ28</sup> mutants were generated using CRISPR/Cas9 genome editing by injecting 12.5 ng/μl sgRNA and 300 ng/μl Cas9 encoding mRNA in AB wildtype embryos at the 1-cell stage. The sgRNA against exon 24 of the *nfasca* gene was designed using CHOPCHOP (Labun et al., 2016) and generated as described (Hruscha et al., 2013). F1 animals were sequenced for indel mutations and an individual with a 28 bp deletion 5' to the target site was selected to raise CRISPR-*Nfasca*<sup>Δ28</sup>.

### Mounting of zebrafish for live cell microscopy

For *in vivo* cell imaging, we anaesthetized zebrafish embryos and larvae using 0.2 mg/ml MS-222 (PHARMAQ, UK). Animals were mounted laterally in 1% ultrapure low melting point agarose (Invitrogen) on a grass coverslip as previously described in detail by us (Vagionitis and Czopka, 2018).

### Immunohistochemistry

Zebrafish embryos or larvae were euthanised with an overdose of MS-222 (15 mM) and fixed overnight in 4% paraformaldehyde at 4°C. Following washes in phosphate buffer saline (PBS- 3 x 10 min), fish were incubated in incrementally increasing concentration of sucrose (10, 20 and 30%) until full submersion. Animals were mounted in TissueTek (OCT), sectioned with 14-17 μm thickness on a cryotome (Leica CM1850 UV) and subsequently stored at -20°C until further use. For immunofluorescence staining, sections were rehydrated using PBS and subsequently boiled in 10mM citrate buffer, pH = 6 for 10 min for antigen retrieval. After 30 min of cooling down in RT and subsequent PBS washes, the slides were permeabilised with PBS containing 0.1% Tween-20 (PBST) for 10-15 minutes. Following blocking in PBST containing 10% fetal calf serum (FCS), 3% normal goat serum (NGS) and 1% bovine serum albumin (BSA), slides were incubated with the primary antibodies in blocking solution overnight at 4°C, washed three times in PBST, and incubated with the secondary antibodies for 1h at room temperature. Finally, slides were washed two times with PBST, once with PBS and then mounted under a coverslip using Prolong Gold Antifade containing DAPI (Invitrogen).

### Whole-mount immunohistochemistry

Zebrafish embryos or larvae were euthanised with an overdose of MS-222 (15 mM) and fixed in 2% paraformaldehyde and 1% trichloroacetic acid for 10 minutes at room temperature. Samples were washed in phosphate buffer saline supplemented with 0.1% Tween20 (PBST- 3 x 5 min). Subsequently, fish were incubated in distilled water for 5 minutes at room temperature. Animals were then permeabilized by being incubated for 10 minutes in acetone at -20°C. A second wash in distilled water was followed by a wash in PBST, both for 5 minutes at room temperature. Blocking was the same as described in the previous paragraph. Primary antibody incubation lasted for 68-72 hours at 4°C. This was followed by 3 washes of 1 hour each with PBST at 4°C. Then the samples were incubated with the secondary antibodies overnight at 4°C. Finally, the fish were again washed 3 times for at least 1 hour each at 4°C, followed by a final wash with PBS for 15 minutes at 4°C and embedding in 1% LMP agarose for confocal microscopy.

### Microscopy and image acquisition

For imaging of embedded zebrafish embryos and larvae we used a confocal laser scanning microscope (Leica TCS SP8). Individual axons were identified and analysed along the whole length of the spinal cord (soma location somite level 5 to somite level 27). DAPI was excited with 405 nm wavelength, Cerulean and tagCFP with 448 and 458 nm, ALEXA488 with 488 nm, EYFP with 514 nm, tagRFpT, mCherry, and ALEXA555 with 552 and 561 nm, and ALEXA633 with 633 nm. During *in vivo* microscopy, confocal z-stacks were acquired as 12bit images with a pixel size ranging between 76 and 114 nm and a z-spacing of 1 μm using a Fluotar VISIR 25x/0.95 WATER immersion objective. Images are shown as lateral views of the zebrafish spinal cord with the anterior to the left and dorsal to the top of the image. Confocal z-stacks of zebrafish spinal cord cross-sections were acquired as 12bit images with a pixel size of 36 nm, z-spacing of 0.19 μm and pinhole set to 0.8AU using an HC PL APO CS2 63x/1.20 WATER immersion objective.

## QUANTIFICATION AND STATISTICAL ANALYSIS

### Reconstructions of confocal images

We used the FilamentTracer tool of Imaris 8.4.2 (Bitplane) to reconstruct the axon morphologies and node positioning. The cytoplasmic marker expressed by the axon was used for manual axon tracing while the nodal marker was automatically traced. The two traces were superimposed for visualisation of the node spacing along single axons.

### Fluorescence intensity measurements

Fluorescent intensities were measured using the x line tool in Fiji (distribution of ImageJ) with a line width adjusted to the thickness of each axon. For each axon, fluorescence intensity values were manually allocated to node, cluster and myelinated categories. One value for the background was obtained for each image and was subtracted. For the intensities of markers at the nodes of Ranvier, 1μm-long axon stretches were measured and averaged. Several nodes and myelinated areas were measured. The fluorescence intensity traces were normalised to the maximum value of the node and the peak was aligned. Average and standard deviation for all nodes were calculated and plotted.

For the partially myelinated axons, one node and one myelinated stretch were measured as well as the unmyelinated part, and all values were normalised to the maximum intensity of the brightest node on the axon of interest.  $\Delta F/F$  was calculated and plotted.

For the swarmplot, background was subtracted. For comparing fluorescent intensities at different positions along the axon, a Kruskal-Wallis test with Dunn's correction for multiple testing was used.

### Node cluster correlation

Clusters were detected by visual impression, as obviously denser accumulations of nodal reporter construct compared to the diffused localisation along unmyelinated parts of the axon devoid of clusters. For the retrospective analysis, images were aligned to a landmark close to the node analysed. If more than one node was analysed on the same axon, the images were realigned for each node. The growth factor of the animal between two imaging sessions was determined as the % change in linear distance between 2 neuronal somata in the spinal cord. This factor was used to correct the aligned images for body growth. For retrospective analysis of node origin, a box with width equal to node width (1–2  $\mu\text{m}$ ) was drawn and superimposed to the aligned images from earlier timepoints. Only when a cluster or a heminode was found inside this border, it was counted as residing at the same position. For the prospective analysis of cluster fates, images were again aligned to a landmark close to the analysed cluster. Again, alignment was corrected for body growth. A box of 2–3  $\mu\text{m}$  width was drawn around each cluster and it was used to assess the cluster fate over time. In these analyses, only clusters and nodes devoid of axon collateral branches were analysed, to exclude the effect of structural obstacles in the analysis.

### Simulation of node cluster correlation

Cluster to node correlation was simulated using a custom written Matlab script available on <https://github.com/Czopka-Lab/Vagionitis-Auer-et-al>. The intercluster/-node distances were randomly generated from normal distributions with the observed means and SDs. Cluster and node width were set to 2  $\mu\text{m}$ . The same number of clusters and nodes, respectively, were generated in our simulations as have been analysed from our measured data. The position of clusters/nodes on the simulated axons were calculated from the intercluster/-node distances by adding these, in addition to adding cluster/node width after each intercluster/-node distance. For the prospective analysis for each cluster, it was checked if there was a node at the same position. Therefore, the positions of the node and cluster were subtracted, and if the absolute difference was less than the node width it was counted as co-localisation. For the retrospective analysis, the same analysis was carried out but for each node it was checked if there was a cluster at the same position. These models give the mean percentage and SD of co-localisations occurring by chance, as well as the maximum observed values for both analyses.

### Sheath length measurements

Individual isolated sheaths of partially myelinated axons were visually selected for being flanked by one or two heminodes. Sheath length was measured using the x line tool of ImageJ. Sheaths were then categorised based on the presence or absence of Nfasca accumulations at their ends.

### Internodal and intercluster distance measurements

The distance along the axon between discrete nodal marker accumulations (clusters or nodes) was measured using the x line tool of ImageJ. The distance between the soma and the first node/cluster was not measured.

For the CRISPR-Nfasca <sup>$\Delta 28$</sup>  analysis, internodal distance was measured along CoPA axons in the spinal cord of 8 and 9 dpf zebrafish. Average internodal distance was calculated for each animal and was directly compared to WT. Analysis was blind, as microscopy and analysis was completed prior to genotyping. Average, range, minimum and maximum internodal distance per individual animal was then plotted.

### Node and cluster dynamics

The distance along individual axons between a node and a chosen landmark was measured over time. The measured distance was corrected for body growth by dividing by the respective growth factor, which was obtained by measuring the distance between two landmarks over time. The corrected internodal lengths were subtracted to calculate daily motility. For the node translocation plot, the initial position of the node was set to 0.

The directionality of movement was not analysed and all movements are expressed as absolute values.

### Nfasca cluster and OPC process interactions

Single images of axons expressing Nfasca-EYFP and showing clusters were analyzed for the presence or not of an OPC process in contact with the clusters on the same 1  $\mu\text{m}$  z-plane. Found contacts were categorized as en passant, when the OPC process seemed to pass by a Nfasca-EYFP cluster or terminal, when the OPC process tip was in contact with the observed cluster.

### Statistics

Mean and standard deviation were always calculated using GraphPad Prism9 (GraphPad Software LLC) descriptive statistics tool. Normality tests were used to assess the Gaussian distribution of the data. Normally distributed data are expressed as mean with

standard deviation (SD). Datasets that contain non-normally distributed data are expressed as median with interquartile range (IQR). Statistical testing was done appropriately according to the type of distribution of data. For simplicity and legibility, the main text always reports mean and standard deviation. Differences in the fluorescence intensity measurements were tested using the Kruskal-Wallis test with multiple comparisons, controlling for False Discovery Rate (FDR) with the two-stage step-up method of Benjamini, Krieger and Yekutieli. Differences in cluster and node motility were tested using the Mann-Whitney test, as was the difference between lengths of sheaths that showed Nfasca-positive or Nfasca-negative heminodes. Differences between intercluster and internode distance were tested using an unpaired t-test. Differences in average internodal distances between WT, Nfasca mutant and rescued Nfasca-EYFP expressing mutant were tested using Brown-Forsythe ANOVA with multiple comparisons. Differences in range of internodes measured per axon between WT, Nfasca mutant and rescued Nfasca-EYFP expressing mutant were tested using Brown-Forsythe ANOVA test with multiple comparisons, as were the differences in maximum measured values per axon. Differences in minimum of internodes measured per axon between WT, Nfasca mutants and rescue Nfasca-EYFP expressing mutants were tested using Kruskal-Wallis test with multiple comparisons. All multiple comparisons tests in the analyses of WT, Nfasca mutant and rescued Nfasca-EYFP expressing mutant were performed controlling for False Discovery Rate (FDR) with the two-stage step-up method of Benjamini, Krieger and Yekutieli.

Cell Reports, Volume 38

**Supplemental information**

**Clusters of neuronal neurofascin prefigure the  
position of a subset of nodes of Ranvier along  
individual central nervous system axons *in vivo***

**Stavros Vagionitis, Franziska Auer, Yan Xiao, Rafael G. Almeida, David A. Lyons, and Tim Czopka**



## SUPPLEMENTARY INFORMATION

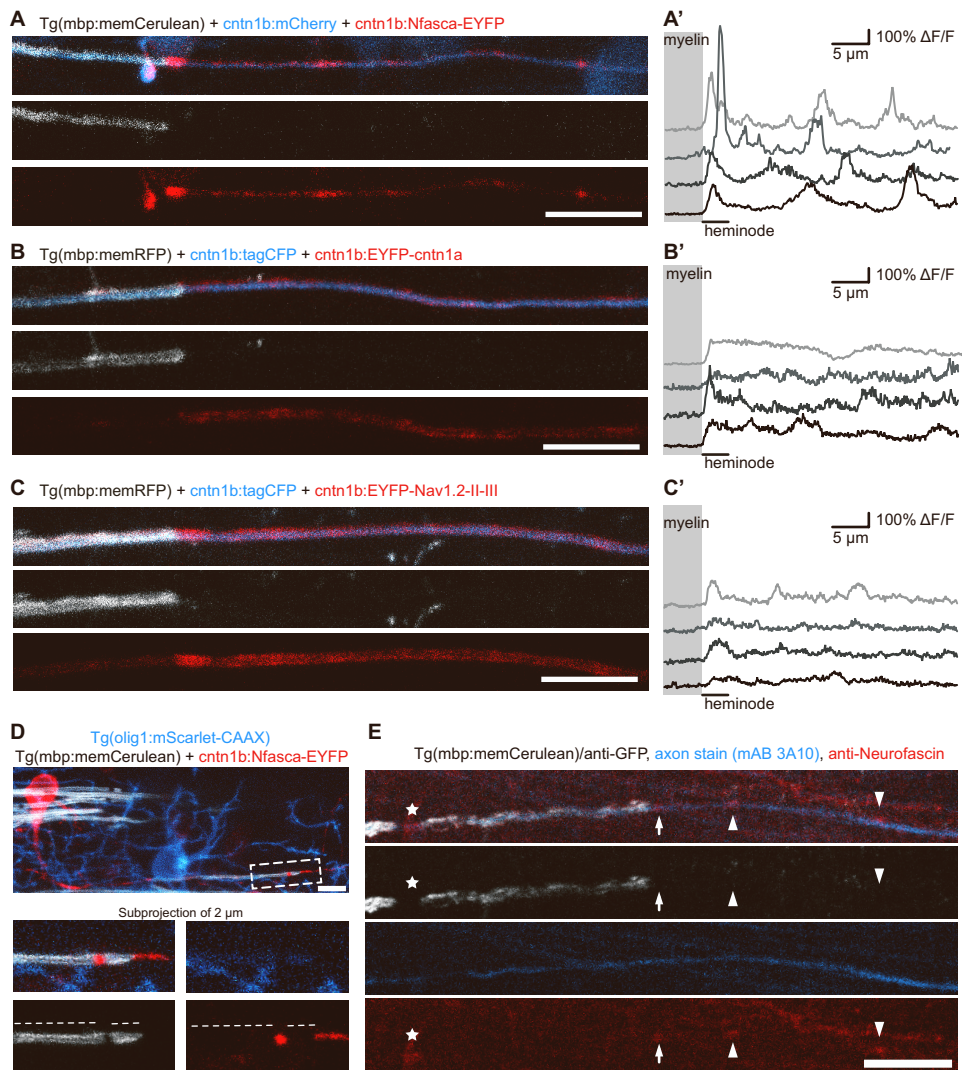

**Figure S1: Localization of nodal reporter constructs along partially myelinated axons. Related to Figure 1.**

**A - C)** Confocal images of a partially myelinated axon expressing cntn1b:Nfasca-EYFP (A), cntn1b:EYFP-cntn1a (B), and cntn1b:NaV-II-III-EYFP (C). Scale bars: 10  $\mu\text{m}$ . A'-C' show respective fluorescence intensity profiles along four partially myelinated axon stretches. Grey box indicates myelin sheath position.

**D)** Confocal image of a single neuron expressing cntn1b:Nfasca-EYFP in a full-transgenic animal labelling OPCs and myelinating oligodendrocytes. Boxed area in the top image shows the area around a node with one established (left) and one very short myelin sheath (right). Single channels reveal complete exclusion of Nfasca fluorescence even under very short myelin sheaths (dashed lines). Scale bar: 10  $\mu\text{m}$ .

**E)** Confocal images of a whole-mount immunohistochemistry staining against 3A10 (large calibre axons – cyan) and Nfasca (red) in the spinal cord of a full transgenic line with all myelin labelled (+staining against GFP – grey). Arrowheads indicate a Nfasca cluster along an unmyelinated axon part. Arrows indicates a heminode and the asterisk indicates the presence of a node of Ranvier. Scale bar: 10  $\mu\text{m}$ .

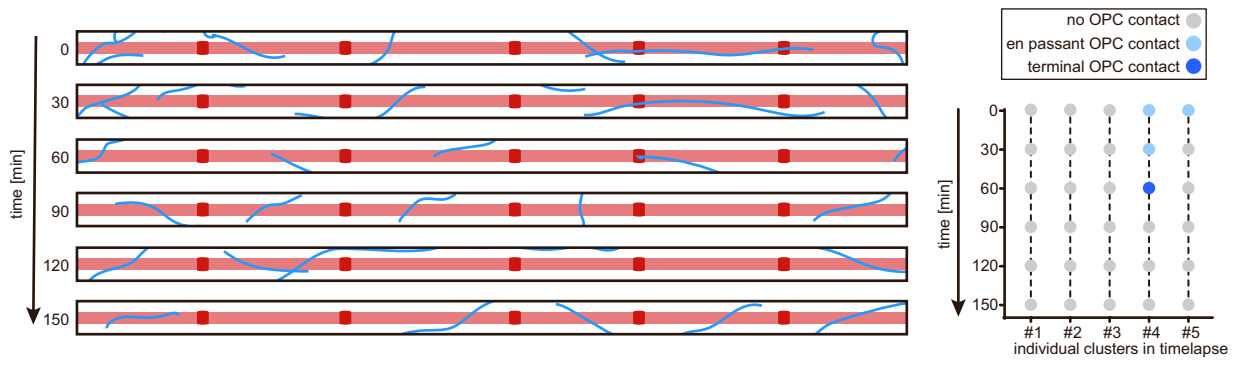

**Figure S2: Reconstructed time-lapse of OPC process association with Nfasca clusters. Related to Figure 2.** Reconstruction of OPC processes around an unmyelinated axonal stretch containing 5 Nfasca clusters, showing examples of process-cluster interactions and their duration, over time.

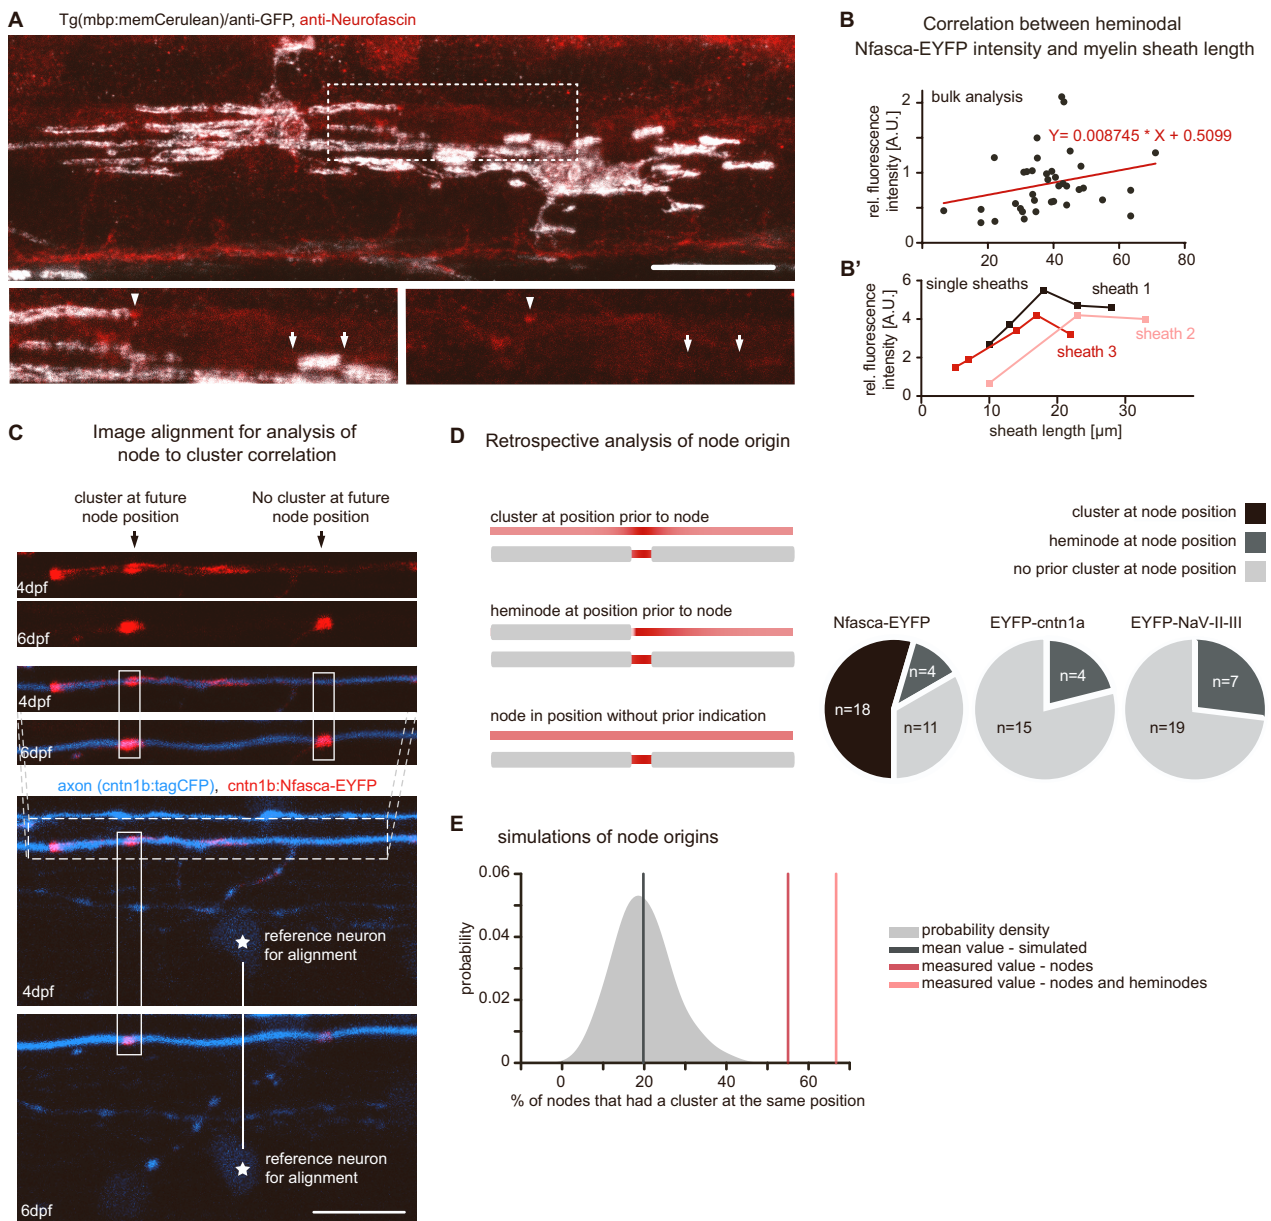

**Figure S3: Assessment of node to cluster correlation. Related to Figure 3**

**A)** Confocal images of whole-mount immunohistochemistry against Nfasca (red) in the spinal cord of a full transgenic line with all myelin labelled (+staining against GFP-grey). **A')** Magnification of the boxed area in panel A. Arrowheads point to Nfasca positive heminodes while arrows point to Nfasca negative heminodes. Scale bar: 20  $\mu$ m.

**B)** Quantification of heminodal Nfasca-EYFP fluorescence intensity relative to myelin sheath length; n=8/2 animals/technical replicates. **B')** Examples of heminodal Nfasca-EYFP fluorescence intensity relative to myelin sheath length along individual axons over time.

**C)** Example confocal images of the same axon stretch before and after its myelination. Images from the two timepoints were aligned to a local landmark (asterisk) and the positions of clusters at the earlier timepoint were compared with the position of the future node. Scale bar 10  $\mu$ m.

**D)** Retrospective analysis of node origin. Cartoon showing three possible origins of nodes. (Right) Pie charts show quantification of node origin for Nfasca-EYFP, EYFP-cntn1a and EYFP-NaV-II-III; n=5/3 animals/technical replicates

**E)** Modelling of node origin and their predicted co-localisation with nodes when random positioning is assumed. The shaded curve shows the probability distribution for the simulated values (grey line indicates the mean of simulated data). The light red and dark red lines indicate the quantified cluster fates analysis shown in panel C.

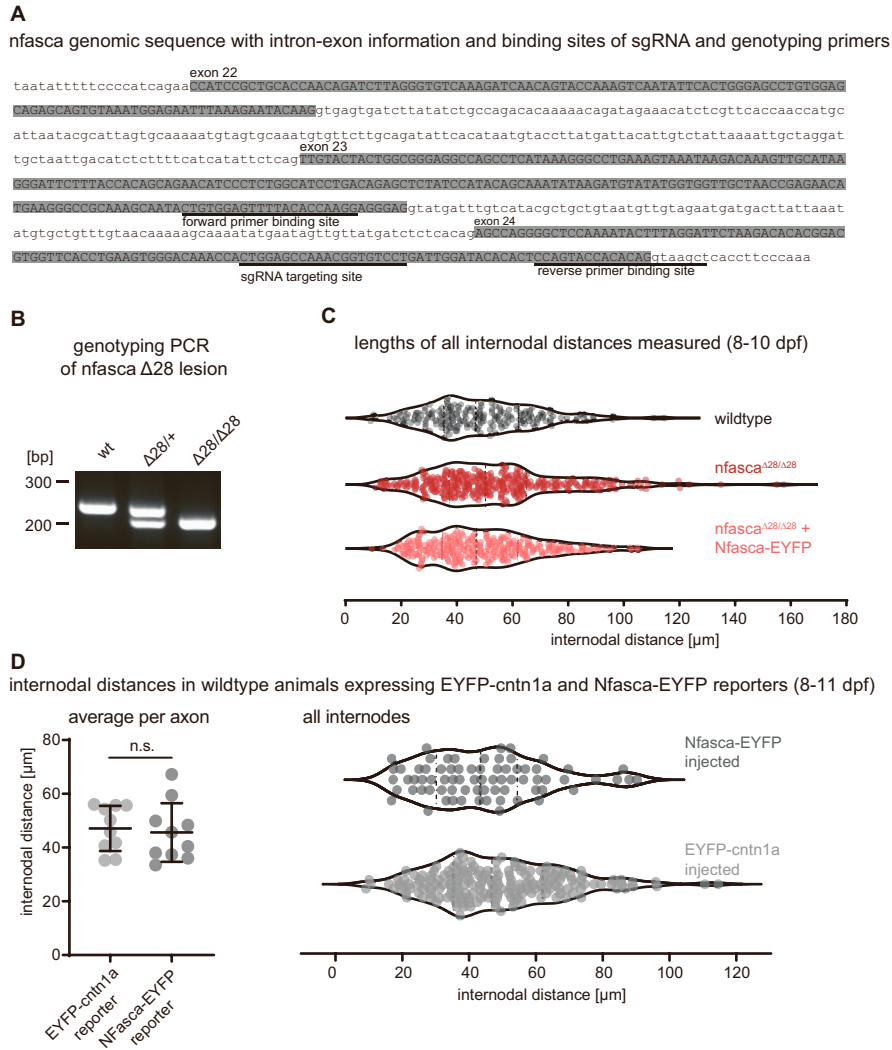

**Figure S4: Characterisation of *Nfasca* mutant zebrafish. Related to Figure 4.**

**A)** Part of the *nfasca* genomic sequence around the sgRNA target site. Intron sequences are shown in lowercase, exon sequences are capitalised and highlighted in grey. Genotyping primer sequences and gRNA recognition site are underscored.

**B)** Example of genotyping PCR results showing wildtype, heterozygous ( $\Delta 28/+$ ) and homozygous ( $\Delta 28/\Delta 28$ ) mutants for the *CRISPR-Nfasca* <sup>$\Delta 28$</sup> .

**C)** Distribution of all internodal distances quantified in Fig. 3G showing all data points.

**D)** Quantification of internodal distances using *Nfasca*-EYFP and EYFP-*cntn1a* reporters. (Left) Average internodal distance per axon. Data shown as mean  $\pm$  SD (unpaired t test); n=9/4 (EYFP-*cntn1a*) and n=10/6 (*Nfasca*-EYFP) animals/technical replicates. (Right) Distribution of all measured internodal distances.

**Table S1: Primers used in this study**

| Primer Name                             | Sequence                                                                                                                                |
|-----------------------------------------|-----------------------------------------------------------------------------------------------------------------------------------------|
| XhoI-NaV-II-III_F                       | CACA <b>CTCGAG</b> ATATGAGCTCTTTCAGTGCCGA                                                                                               |
| XbaI-NaV-II-III_R                       | CA <b>TCTAGA</b> TTAGATAAAGCAGGTTTTCCTGA                                                                                                |
| attB1_EYFP_F                            | GGGGACAAGTTTGTACAAAAAAGCAGGCT <b>GCCACC</b> ATGGTGAGCAAGGGCGAGGAG                                                                       |
| attB2R-NaV-II-III_R                     | GGGGACCAC <b>TTTGTACA</b> AAGAAAGCTGGGT <b>C</b> TTAGATAAAGCAGGTTTTCCTGA                                                                |
| EcoRI_cntn1a_F                          | CACAG <b>GAATTC</b> CCGGTGTTCGAGGAGCAGC                                                                                                 |
| XbaI_cntn1a_R                           | CA <b>TCTAGA</b> TCAGAGCATCAGAGTCCAGAG                                                                                                  |
| attB1_sigpep_F                          | GGGGACAAGTTTGTACAAAAAAGCAGGCT <b>GCCACC</b> ATGAAAGCTTCTGTCTGGAG                                                                        |
| attb2R_cntn1a_R                         | GGGGACCAC <b>TTTGTACA</b> AAGAAAGCTGGGT <b>C</b> TCAGAGCATCAGAGTCCAGAG                                                                  |
| attb4_cntn1b_1kb_F                      | GGGGACA <b>ACTTTGTATAGAAA</b> AGTTGGATTCACCAATCAGACGACTC                                                                                |
| attB1R_cntn1b_E2_R                      | GGGGACTGCTTTTTTTGTACAA <b>ACTTTGGAT</b> CCAGCAGTCCAAAAACC                                                                               |
| attB1_F                                 | GGGACAAGTTTGTACAAAAAAGCAGGCT                                                                                                            |
| CAAX-mScarlet_R                         | TCAGGAGAGCACACACTTGCAGCTCATGCAGCCGGGGCCACTCTCATCAGGAGGGTTCA<br>GCTTCTTGTACAGCTCGTCCATG                                                  |
| attB2R-CAAX-R                           | GGGGACCAC <b>TTTGTACA</b> AAGAAAGCTGGGT <b>C</b> TCAGGAGAGCACACACTTGC                                                                   |
| sgRNA name                              | Sequence                                                                                                                                |
| Nfasca_guide#3<br>(targeted underlined) | AAAGCACCGACTCGGTGCCACTTTTTCAAGTTGATAACGGACTAGCCTTATTTTA<br>ACTTGCTATTTCTAGCTCTAAAACC <u>TGGAGCCAAACGGTGTCTCTATAGTGAGTC</u><br>GTATTACGC |
| Nfasca_#3_F1                            | TAATACGACTCACTATAGAGGACACCGTTTGGCTCC                                                                                                    |
| Nfasca_#3_R1                            | TTCTAGCTCTAAAACCTGGAGCCAAACGGTGTCC                                                                                                      |
| genotyping primer name                  | Sequence                                                                                                                                |
| Nfasca_genotype_F                       | CTGTGGAGTTTACACCAAGG                                                                                                                    |
| Nfasca_genotype_R                       | GCTTACCTGTGTGGTACTGG                                                                                                                    |

Colour code: att recombination site, restriction site, Kozak sequence, base to avoid frame shift, gene specific target sequence
